# Supplementary material
Source: PubMed Central journal article supplement (PMC2875976)
Supplement: Supp_Fig.pdf [file Supp_Fig.pdf]

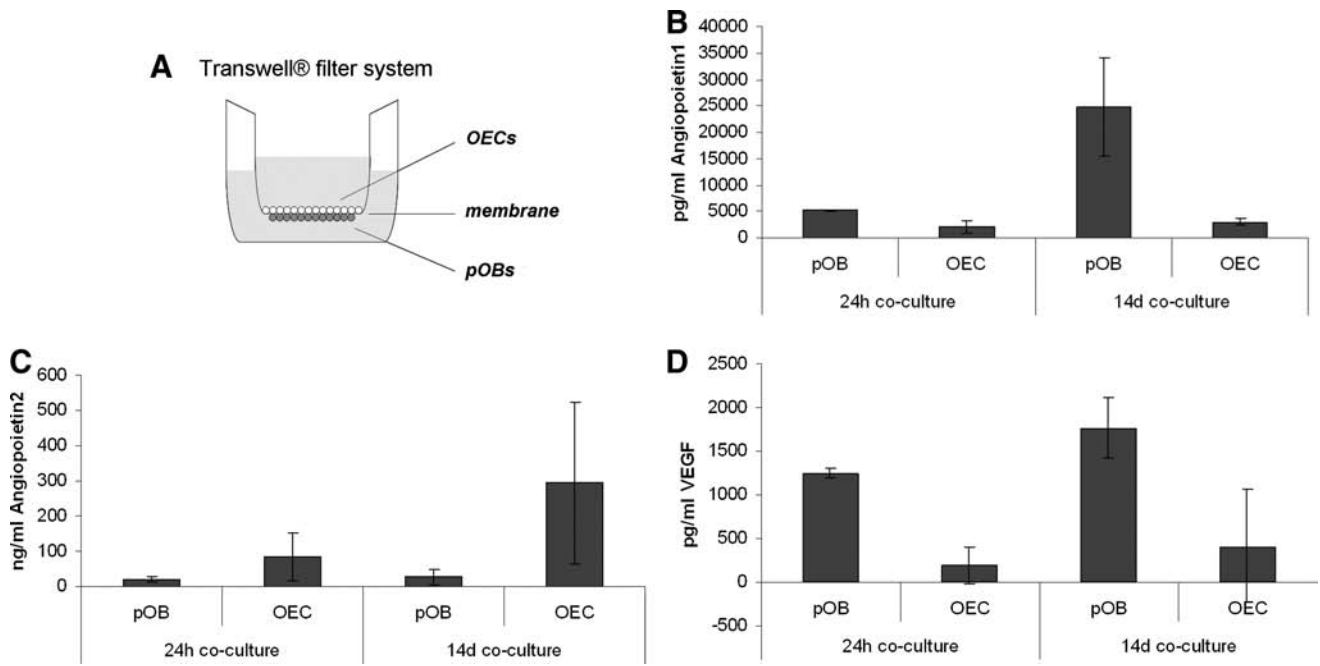

**SUPPLEMENTAL FIG. S1.** Indirect cocultures on Transwell® filter systems. (A) pOBs were seeded at the upper surface, and OECs were seeded at the lower surface of a transmembrane filter in a Transwell® filter system for 24 h and 14 days without stimulation to gain insights into the origin of the growth factors found in the coculture. Culture supernatants of OECs and pOBs were collected separately from the Transwell filter system and analyzed for the angiogenic factors angiopoietin1 (B), angiopoietin2 (C), and VEGF (D) using enzyme-linked immunosorbent assay. Results are shown as absolute values. OECs, outgrowth endothelial cells; pOBs, primary osteoblasts; VEGF, vascular endothelial growth factor.
